# Supplementary material for: Influence of Critical Parameters on Cytotoxicity Induced by Mesoporous Silica Nanoparticles
Source: MDPI journal article supplement (doi:10.3390/nano12122016), 2022-06-11
Supplement: s1 [file s1]

## Supplementary Materials

**Table S1. Mean ranks of Study groups.**

|           | Study Groups                     | N  | Mean Rank |
|-----------|----------------------------------|----|-----------|
| Viability | Wright et al., 2021              | 6  | 958.17    |
|           | Zhao et al., 2019                | 18 | 756.25    |
|           | Wu et al., 2019                  | 12 | 828.17    |
|           | Yan et al., 2020                 | 16 | 678.44    |
|           | Kundu et al., 2020               | 6  | 498.58    |
|           | Deng et al., 2021                | 12 | 134.00    |
|           | Kim et al., 2021                 | 30 | 681.28    |
|           | Vejdani Noghreiyani et al., 2020 | 5  | 918.50    |
|           | Zhang et al., 2020               | 36 | 687.26    |
|           | Ali et al., 2020                 | 6  | 602.42    |
|           | Wang et al., 2019                | 12 | 879.71    |
|           | Khatoon et al., 2018             | 5  | 603.80    |
|           | Maksimović-Ivanić et al., 2019   | 9  | 453.78    |
|           | Yang et al., 2019                | 32 | 403.19    |
|           | Xie et al., 2016                 | 10 | 483.90    |
|           | Paris et al., 2016               | 10 | 953.75    |
|           | Guo et al., 2016                 | 32 | 731.28    |
|           | Ebabe Elle et al., 2016          | 32 | 142.03    |
|           | You et al., 2016                 | 6  | 334.00    |
|           | Zhang et al., 2016               | 8  | 616.13    |
|           | Mannerström et al., 2016         | 64 | 587.49    |
|           | T. Li et al., 2017               | 6  | 699.33    |
|           | Ferrauto et al., 2017            | 6  | 925.42    |
|           | Chen et al., 2016                | 28 | 700.57    |
|           | Cheng et al., 2017               | 20 | 533.63    |
|           | Fei et al., 2017                 | 96 | 447.24    |
|           | Zhou et al., 2017                | 30 | 879.18    |

|  |                               |      |         |
|--|-------------------------------|------|---------|
|  | Nguyen et al., 2017           | 44   | 417.00  |
|  | Dréau et al., 2016            | 14   | 969.68  |
|  | Kienzle et al., 2017          | 17   | 692.68  |
|  | Liu et al., 2017              | 29   | 761.76  |
|  | Chou et al., 2017             | 72   | 647.11  |
|  | Paatero et al., 2017          | 12   | 1130.75 |
|  | Y. Li et al., 2017            | 6    | 642.33  |
|  | Martínez-Carmona et al., 2018 | 8    | 280.75  |
|  | Hei et al., 2017              | 4    | 699.88  |
|  | Gounani et al., 2018          | 144  | 750.61  |
|  | Saroj and Rajput, 2018        | 24   | 734.58  |
|  | Tran et al., 2018             | 10   | 407.70  |
|  | Li et al., 2018               | 32   | 566.77  |
|  | Hou et al., 2018              | 6    | 730.00  |
|  | Braun et al., 2018            | 155  | 682.31  |
|  | Guo et al., 2018              | 16   | 650.69  |
|  | Lu et al., 2018               | 28   | 703.93  |
|  | Mohammadpour et al., 2019     | 64   | 296.77  |
|  | Total                         | 1238 |         |

**Table S2. Post hoc test of Study Groups**

| Sample 1-Sample 2                                  | Test<br>Statistic | Std.<br>Error | Std.<br>Test<br>Statistic | Adj.<br>Sig. <sup>a</sup> |
|----------------------------------------------------|-------------------|---------------|---------------------------|---------------------------|
| Deng et al., 2021-Chou et al., 2017                | -<br>513.111      | 111.477       | -4.603                    | 0.004                     |
| Deng et al., 2021-Kim et al., 2021                 | -<br>547.283      | 122.117       | -4.482                    | 0.007                     |
| Deng et al., 2021-Braun et al., 2018               | -<br>548.313      | 107.129       | -5.118                    | 0.000                     |
| Deng et al., 2021-Zhang et al., 2020               | -<br>553.264      | 119.174       | -4.642                    | 0.003                     |
| Deng et al., 2021-Kienzle et al., 2017             | -<br>558.676      | 134.799       | -4.145                    | 0.034                     |
| Deng et al., 2021-Chen et al., 2016                | -<br>566.571      | 123.357       | -4.593                    | 0.004                     |
| Deng et al., 2021-Lu et al., 2018                  | -<br>569.929      | 123.357       | -4.620                    | 0.004                     |
| Deng et al., 2021-Guo et al., 2016                 | -<br>597.281      | 121.022       | -4.935                    | 0.001                     |
| Deng et al., 2021-Saroj and Rajput, 2018           | -<br>600.583      | 126.403       | -4.751                    | 0.002                     |
| Deng et al., 2021-Gounani et al., 2018             | -<br>616.615      | 107.422       | -5.740                    | 0.000                     |
| Deng et al., 2021-Zhao et al., 2019                | 622.250           | 133.241       | 4.670                     | 0.003                     |
| Deng et al., 2021-Liu et al., 2017                 | -<br>627.759      | 122.717       | -5.115                    | 0.000                     |
| Deng et al., 2021-Wu et al., 2019                  | 694.167           | 145.958       | 4.756                     | 0.002                     |
| Deng et al., 2021-Zhou et al., 2017                | -<br>745.183      | 122.117       | -6.102                    | 0.000                     |
| Deng et al., 2021-Wang et al., 2019                | -<br>745.708      | 145.958       | -5.109                    | 0.000                     |
| Deng et al., 2021-Vejdani Noghreiyani et al., 2020 | -<br>784.500      | 190.306       | -4.122                    | 0.037                     |
| Deng et al., 2021-Ferrauto et al., 2017            | -<br>791.417      | 178.761       | -4.427                    | 0.009                     |

|                                                  |              |         |        |       |
|--------------------------------------------------|--------------|---------|--------|-------|
| Deng et al., 2021-Paris et al., 2016             | -<br>819.750 | 153.082 | -5.355 | 0.000 |
| Deng et al., 2021-Wright et al., 2021            | 824.167      | 178.761 | 4.610  | 0.004 |
| Deng et al., 2021-Dréau et al., 2016             | -<br>835.679 | 140.649 | -5.942 | 0.000 |
| Deng et al., 2021-Paatero et al., 2017           | -<br>996.750 | 145.958 | -6.829 | 0.000 |
| Ebabe Elle et al., 2016-Fei et al., 2017         | -<br>305.214 | 72.979  | -4.182 | 0.029 |
| Ebabe Elle et al., 2016-Li et al., 2018          | -<br>424.734 | 89.381  | -4.752 | 0.002 |
| Ebabe Elle et al., 2016-Mannerström et al., 2016 | -<br>445.461 | 77.406  | -5.755 | 0.000 |
| Ebabe Elle et al., 2016-Chou et al., 2017        | -<br>505.080 | 75.959  | -6.649 | 0.000 |
| Ebabe Elle et al., 2016-Guo et al., 2018         | -<br>508.656 | 109.468 | -4.647 | 0.003 |
| Ebabe Elle et al., 2016-Yan et al., 2020         | 536.406      | 109.468 | 4.900  | 0.001 |
| Ebabe Elle et al., 2016-Kim et al., 2021         | 539.252      | 90.858  | 5.935  | 0.000 |
| Ebabe Elle et al., 2016-Braun et al., 2018       | -<br>540.282 | 69.420  | -7.783 | 0.000 |
| Ebabe Elle et al., 2016-Zhang et al., 2020       | 545.233      | 86.862  | 6.277  | 0.000 |
| Ebabe Elle et al., 2016-Kienzle et al., 2017     | -<br>550.645 | 107.301 | -5.132 | 0.000 |
| Ebabe Elle et al., 2016-Chen et al., 2016        | -<br>558.540 | 92.518  | -6.037 | 0.000 |
| Ebabe Elle et al., 2016-Lu et al., 2018          | -<br>561.897 | 92.518  | -6.073 | 0.000 |
| Ebabe Elle et al., 2016-Guo et al., 2016         | 589.250      | 89.381  | 6.593  | 0.000 |
| Ebabe Elle et al., 2016-Saroj and Rajput, 2018   | -<br>592.552 | 96.542  | -6.138 | 0.000 |
| Ebabe Elle et al., 2016-Gounani et al., 2018     | -<br>608.583 | 69.872  | -8.710 | 0.000 |
| Ebabe Elle et al., 2016-Zhao et al., 2019        | 614.219      | 105.336 | 5.831  | 0.000 |

|                                                          |              |         |        |       |
|----------------------------------------------------------|--------------|---------|--------|-------|
| Ebabe Elle et al., 2016-Liu et al., 2017                 | -<br>619.727 | 91.663  | -6.761 | 0.000 |
| Ebabe Elle et al., 2016-Wu et al., 2019                  | 686.135      | 121.022 | 5.670  | 0.000 |
| Ebabe Elle et al., 2016-Zhou et al., 2017                | -<br>737.152 | 90.858  | -8.113 | 0.000 |
| Ebabe Elle et al., 2016-Wang et al., 2019                | 737.677      | 121.022 | 6.095  | 0.000 |
| Ebabe Elle et al., 2016-Vejdani Noghreiyani et al., 2020 | 776.469      | 171.927 | 4.516  | 0.006 |
| Ebabe Elle et al., 2016-Ferrauto et al., 2017            | -<br>783.385 | 159.054 | -4.925 | 0.001 |
| Ebabe Elle et al., 2016-Paris et al., 2016               | 811.719      | 129.525 | 6.267  | 0.000 |
| Ebabe Elle et al., 2016-Wright et al., 2021              | 816.135      | 159.054 | 5.131  | 0.000 |
| Ebabe Elle et al., 2016-Dréau et al., 2016               | -<br>827.647 | 114.563 | -7.224 | 0.000 |
| Ebabe Elle et al., 2016-Paatero et al., 2017             | -<br>988.719 | 121.022 | -8.170 | 0.000 |
| Martínez-Carmona et al., 2018-Zhou et al., 2017          | 598.433      | 142.262 | 4.207  | 0.026 |
| Martínez-Carmona et al., 2018-Dréau et al., 2016         | 688.929      | 158.455 | 4.348  | 0.014 |
| Martínez-Carmona et al., 2018-Paatero et al., 2017       | 850.000      | 163.186 | 5.209  | 0.000 |
| Mohammadpour et al., 2019-Mannerström et al., 2016       | 290.719      | 63.202  | 4.600  | 0.004 |
| Mohammadpour et al., 2019-Chou et al., 2017              | 350.338      | 61.421  | 5.704  | 0.000 |
| Mohammadpour et al., 2019-Kim et al., 2021               | 384.510      | 79.107  | 4.861  | 0.001 |
| Mohammadpour et al., 2019-Braun et al., 2018             | 385.539      | 53.121  | 7.258  | 0.000 |
| Mohammadpour et al., 2019-Zhang et al., 2020             | 390.490      | 74.484  | 5.243  | 0.000 |
| Mohammadpour et al., 2019-Kienzle et al., 2017           | 395.903      | 97.551  | 4.058  | 0.049 |
| Mohammadpour et al., 2019-Chen et al., 2016              | 403.798      | 81.008  | 4.985  | 0.001 |
| Mohammadpour et al., 2019-Lu et al., 2018                | 407.155      | 81.008  | 5.026  | 0.000 |
| Mohammadpour et al., 2019-Guo et al., 2016               | 434.508      | 77.406  | 5.613  | 0.000 |
| Mohammadpour et al., 2019-Saroj and Rajput, 2018         | 437.810      | 85.575  | 5.116  | 0.000 |
| Mohammadpour et al., 2019-Gounani et al., 2018           | 453.841      | 53.711  | 8.450  | 0.000 |
| Mohammadpour et al., 2019-Zhao et al., 2019              | 459.477      | 95.386  | 4.817  | 0.001 |

|                                                 |              |         |        |       |
|-------------------------------------------------|--------------|---------|--------|-------|
| Mohammadpour et al., 2019-Liu et al., 2017      | 464.985      | 80.031  | 5.810  | 0.000 |
| Mohammadpour et al., 2019-Wu et al., 2019       | 531.393      | 112.468 | 4.725  | 0.002 |
| Mohammadpour et al., 2019-Zhou et al., 2017     | 582.410      | 79.107  | 7.362  | 0.000 |
| Mohammadpour et al., 2019-Wang et al., 2019     | 582.935      | 112.468 | 5.183  | 0.000 |
| Mohammadpour et al., 2019-Ferrauto et al., 2017 | 628.643      | 152.646 | 4.118  | 0.038 |
| Mohammadpour et al., 2019-Paris et al., 2016    | 656.977      | 121.571 | 5.404  | 0.000 |
| Mohammadpour et al., 2019-Wright et al., 2021   | 661.393      | 152.646 | 4.333  | 0.015 |
| Mohammadpour et al., 2019-Dréau et al., 2016    | 672.905      | 105.486 | 6.379  | 0.000 |
| Mohammadpour et al., 2019-Paatero et al., 2017  | 833.977      | 112.468 | 7.415  | 0.000 |
| You et al., 2016-Paatero et al., 2017           | -<br>796.750 | 178.761 | -4.457 | 0.008 |
| Yang et al., 2019-Gounani et al., 2018          | -<br>347.427 | 69.872  | -4.972 | 0.001 |
| Yang et al., 2019-Zhou et al., 2017             | -<br>475.996 | 90.858  | -5.239 | 0.000 |
| Yang et al., 2019-Paris et al., 2016            | -<br>550.563 | 129.525 | -4.251 | 0.021 |
| Yang et al., 2019-Dréau et al., 2016            | -<br>566.491 | 114.563 | -4.945 | 0.001 |
| Yang et al., 2019-Paatero et al., 2017          | -<br>727.563 | 121.022 | -6.012 | 0.000 |
| Tran et al., 2018-Paatero et al., 2017          | 723.050      | 153.082 | 4.723  | 0.002 |
| Nguyen et al., 2017-Braun et al., 2018          | -<br>265.313 | 61.071  | -4.344 | 0.014 |
| Nguyen et al., 2017-Gounani et al., 2018        | -<br>333.615 | 61.585  | -5.417 | 0.000 |
| Nguyen et al., 2017-Zhou et al., 2017           | 462.183      | 84.651  | 5.460  | 0.000 |
| Nguyen et al., 2017-Paris et al., 2016          | 536.750      | 125.249 | 4.285  | 0.018 |
| Nguyen et al., 2017-Dréau et al., 2016          | -<br>552.679 | 109.705 | -5.038 | 0.000 |
| Nguyen et al., 2017-Paatero et al., 2017        | -<br>713.750 | 116.434 | -6.130 | 0.000 |
| Fei et al., 2017-Braun et al., 2018             | -<br>235.068 | 46.434  | -5.062 | 0.000 |

|                                                                                                                                                                                       |              |         |        |       |
|---------------------------------------------------------------------------------------------------------------------------------------------------------------------------------------|--------------|---------|--------|-------|
| Fei et al., 2017-Gounani et al., 2018                                                                                                                                                 | -<br>303.370 | 47.108  | -6.440 | 0.000 |
| Fei et al., 2017-Liu et al., 2017                                                                                                                                                     | -<br>314.514 | 75.757  | -4.152 | 0.033 |
| Fei et al., 2017-Zhou et al., 2017                                                                                                                                                    | -<br>431.939 | 74.781  | -5.776 | 0.000 |
| Fei et al., 2017-Paris et al., 2016                                                                                                                                                   | 506.505      | 118.801 | 4.263  | 0.020 |
| Fei et al., 2017-Dréau et al., 2016                                                                                                                                                   | -<br>522.434 | 102.282 | -5.108 | 0.000 |
| Fei et al., 2017-Paatero et al., 2017                                                                                                                                                 | -<br>683.505 | 109.468 | -6.244 | 0.000 |
| Maksimović-Ivanić et al., 2019-Paatero et al., 2017                                                                                                                                   | -<br>676.972 | 157.653 | -4.294 | 0.017 |
| Xie et al., 2016-Paatero et al., 2017                                                                                                                                                 | -<br>646.850 | 153.082 | -4.226 | 0.024 |
| Cheng et al., 2017-Paatero et al., 2017                                                                                                                                               | -<br>597.125 | 130.549 | -4.574 | 0.005 |
| Li et al., 2018-Paatero et al., 2017                                                                                                                                                  | 563.984      | 121.022 | 4.660  | 0.003 |
| Mannerström et al., 2016-Paatero et al., 2017                                                                                                                                         | -<br>543.258 | 112.468 | -4.830 | 0.001 |
| Chou et al., 2017-Paatero et al., 2017                                                                                                                                                | -<br>483.639 | 111.477 | -4.338 | 0.014 |
| Braun et al., 2018-Paatero et al., 2017                                                                                                                                               | 448.437      | 107.129 | 4.186  | 0.028 |
| Each row tests the null hypothesis that the Sample 1 and Sample 2 distributions are the same. Asymptotic significances (2-sided tests) are displayed. The significance level is 0.05. |              |         |        |       |
| <sup>a</sup> Significance values have been adjusted by the Bonferroni correction for multiple tests.                                                                                  |              |         |        |       |

**Table S3. Normality Tests for different MSN Sizes**

|           | MSN Size       | Shapiro-Wilk |     |       |
|-----------|----------------|--------------|-----|-------|
|           |                | Statistic    | df  | Sig.  |
| Viability | under100       | 0.992        | 136 | 0.619 |
|           | Between100&200 | 0.801        | 596 | 0.000 |
|           | Between200&300 | 0.881        | 309 | 0.000 |
|           | Between300&400 | 0.744        | 89  | 0.000 |
|           | Between400&500 | 0.933        | 46  | 0.011 |
|           | above500       | 0.902        | 64  | 0.000 |

**Table S4. Normality Tests for different viability assay method groups**

|           | Viability Assay Method     | Shapiro-Wilk |     |       |
|-----------|----------------------------|--------------|-----|-------|
|           |                            | Statistic    | df  | Sig.  |
| Viability | Alamar Blue                | 0.962        | 9   | 0.817 |
|           | Annexin V/IP               | 0.779        | 12  | 0.005 |
|           | ATP-assay                  | 0.823        | 31  | 0.000 |
|           | CCK-8 Assay                | 0.727        | 246 | 0.000 |
|           | CellTiter 96 AQueous Assay | 0.950        | 8   | 0.713 |
|           | CellTiterGlo               | 0.718        | 41  | 0.000 |
|           | FACS                       | 0.548        | 31  | 0.000 |
|           | MTS assay                  | 0.957        | 30  | 0.257 |
|           | MTT                        | 0.755        | 648 | 0.000 |
|           | NRU                        | 0.865        | 16  | 0.023 |
|           | SRB                        | 0.960        | 6   | 0.816 |
|           | WST-1                      | 0.940        | 86  | 0.001 |
|           | WST-8                      | 0.710        | 72  | 0.000 |



**Table S5. Normality Tests for different incubation times**

|           | Incubation time | Shapiro-Wilk |     |       |
|-----------|-----------------|--------------|-----|-------|
|           |                 | Statistic    | df  | Sig.  |
| Viability | 24 h            | 0.762        | 567 | 0.000 |
|           | 48 h            | 0.806        | 467 | 0.000 |
|           | 72 h            | 0.891        | 183 | 0.000 |
|           |                 |              |     |       |

**Table S6. Normality tests for different MSN zeta-potential**

|           | Zeta-potential groups | Shapiro-Wilk |     |       |
|-----------|-----------------------|--------------|-----|-------|
|           |                       | Statistic    | df  | Sig.  |
| Viability | -30 and below         | 0.835        | 453 | 0.000 |
|           | -30 to -10            | 0.750        | 345 | 0.000 |
|           | -10 to +10            | 0.709        | 29  | 0.000 |
|           | +10 to +30            | 0.767        | 264 | 0.000 |
|           | +30 and above         | 0.816        | 149 | 0.000 |

**Table S7. Normality tests for different functionalisation types.**

| Functionalisation Groups |                                 | Shapiro-Wilk |     |       |
|--------------------------|---------------------------------|--------------|-----|-------|
|                          |                                 | Statistic    | df  | Sig.  |
| Viability                | 3- aminopropyl                  | 0.926        | 22  | 0.103 |
|                          | F2                              | 0.891        | 5   | 0.364 |
|                          | Ag-Nps                          | 0.933        | 14  | 0.339 |
|                          | Amine group (-NH <sub>2</sub> ) | 0.822        | 164 | 0.000 |
|                          | F5                              | 0.912        | 14  | 0.166 |
|                          | Caffeic acid                    | 0.817        | 8   | 0.044 |
|                          | carboxyl functionalised         | 0.837        | 138 | 0.000 |
|                          | F8                              | 0.949        | 15  | 0.501 |
|                          | F9                              | 0.960        | 6   | 0.816 |
|                          | F10                             | 0.924        | 24  | 0.072 |

|                     |       |     |       |
|---------------------|-------|-----|-------|
| F11                 | 0.941 | 24  | 0.175 |
| F12                 | 0.917 | 24  | 0.049 |
| concanavalin A      | 0.950 | 8   | 0.713 |
| DSPE-PEG2K-FA       | 0.891 | 15  | 0.070 |
| F15                 | 0.863 | 10  | 0.084 |
| Fluorescein PEI-PEG | 0.958 | 17  | 0.599 |
| F17                 | 0.829 | 16  | 0.007 |
| F18                 | 0.911 | 28  | 0.021 |
| Hyaluronic acid     | 0.931 | 16  | 0.249 |
| F20                 | 0.899 | 6   | 0.371 |
| F21                 | 0.913 | 16  | 0.129 |
| F22                 | 0.892 | 14  | 0.085 |
| none                | 0.753 | 463 | 0.000 |
| OH                  | 0.867 | 5   | 0.253 |
| PEG/COOH            | 0.948 | 36  | 0.089 |
| Phenylboronic acid  | 0.950 | 12  | 0.632 |
| F27                 | 0.950 | 6   | 0.740 |
| polyacrylic acid    | 0.758 | 24  | 0.000 |
| polyethyleneimine   | 0.813 | 8   | 0.040 |
| F30                 | 0.821 | 8   | 0.048 |
| Rutin               | 0.963 | 8   | 0.842 |
| F32                 | 0.938 | 22  | 0.178 |
| F33                 | 0.973 | 3   | 0.683 |
| F34                 | 1.000 | 3   | 1.000 |
| F35                 | 0.945 | 3   | 0.550 |
| F36                 | 0.882 | 3   | 0.329 |
| Thiol-modified MSN  | 0.695 | 8   | 0.002 |
| Titanium            | 0.967 | 5   | 0.854 |
| F39                 | 0.816 | 14  | 0.008 |
| F40                 | 0.825 | 4   | 0.155 |

**Table S8. Normality test for cell types' viability**

| Cell Type Groups |              | Shapiro-Wilk |    |       |
|------------------|--------------|--------------|----|-------|
|                  |              | Statistic    | df | Sig.  |
| Viability        | 3T3          | 0.705        | 6  | 0.007 |
|                  | 4T1          | 0.954        | 14 | 0.620 |
|                  | A549         | 0.868        | 6  | 0.217 |
|                  | A875         | 0.916        | 10 | 0.322 |
|                  | B16-F10      | 0.967        | 10 | 0.866 |
|                  | BALB/c 3T3   | 0.876        | 32 | 0.002 |
|                  | BEAS-2B      | 0.831        | 36 | 0.000 |
|                  | bEND.3       | 0.730        | 6  | 0.013 |
|                  | C2C12        | 0.896        | 20 | 0.035 |
|                  | Caco-2       | 0.954        | 40 | 0.103 |
|                  | CCRF-CEM     | 0.981        | 8  | 0.966 |
|                  | Colon-26     | 0.926        | 4  | 0.571 |
|                  | COS7         | 0.962        | 10 | 0.805 |
|                  | Daudi        | 0.978        | 10 | 0.950 |
|                  | DMSCs        | 0.902        | 10 | 0.228 |
|                  | EA.hy926     | 0.898        | 3  | 0.379 |
|                  | HaCaT        | 0.798        | 14 | 0.005 |
|                  | HaCaT-L      | 0.951        | 16 | 0.501 |
|                  | HEK 293 T    | 0.956        | 22 | 0.421 |
|                  | HEK-293      | 0.756        | 97 | 0.000 |
|                  | HEK-293TRPA1 | 0.799        | 8  | 0.028 |
|                  | HEK-293TRPM2 | 0.824        | 8  | 0.051 |
|                  | HEK-293TRPM8 | 0.880        | 8  | 0.188 |
|                  | HEK-293TRPV4 | 0.878        | 8  | 0.178 |
|                  | HeLa         | 0.938        | 26 | 0.121 |
|                  | HEP-G2       | 0.897        | 99 | 0.000 |
|                  | HFF-1        | 0.837        | 48 | 0.000 |

|             |       |     |       |
|-------------|-------|-----|-------|
| HFLS        | 0.974 | 12  | 0.952 |
| HL-7702     | 0.804 | 12  | 0.010 |
| hMSCs       | 0.897 | 6   | 0.358 |
| HOS         | 0.963 | 5   | 0.829 |
| HT-29       | 0.961 | 9   | 0.809 |
| Huh-7       | 0.982 | 4   | 0.911 |
| HUVEC       | 0.805 | 24  | 0.000 |
| Jurkat      | 0.923 | 10  | 0.384 |
| L-02        | 0.979 | 54  | 0.440 |
| L929        | 0.983 | 3   | 0.752 |
| LNCaP       | 0.738 | 12  | 0.002 |
| LS 174T     | 0.980 | 12  | 0.983 |
| MC3T3-E1    | 0.896 | 4   | 0.410 |
| MCF-10a     | 0.812 | 4   | 0.125 |
| MCF-7       | 0.838 | 100 | 0.000 |
| MDA-MB-231  | 0.687 | 32  | 0.000 |
| MDCK        | 0.928 | 6   | 0.565 |
| MMT         | 0.883 | 7   | 0.239 |
| Mtag        | 0.686 | 7   | 0.003 |
| NCM460      | 0.923 | 3   | 0.464 |
| NIH-3T3     | 0.783 | 14  | 0.003 |
| NR8383      | 0.809 | 16  | 0.004 |
| PC-3        | 0.796 | 12  | 0.008 |
| Raji        | 0.981 | 10  | 0.971 |
| Ramos (RA1) | 0.909 | 13  | 0.178 |
| RAW 264.7   | 0.891 | 20  | 0.028 |
| SCC-7       | 0.891 | 5   | 0.364 |
| SH-SY5Y     | 0.699 | 5   | 0.009 |
| SK-BR-3     | 0.825 | 4   | 0.155 |
| SMMC-77721  | 0.939 | 4   | 0.648 |

|  |             |       |     |       |
|--|-------------|-------|-----|-------|
|  | SW480       | 0.936 | 3   | 0.510 |
|  | SW620       | 0.883 | 5   | 0.325 |
|  | THP-1       | 0.920 | 36  | 0.013 |
|  | TZM-bl      | 0.913 | 155 | 0.000 |
|  | U937        | 0.930 | 16  | 0.247 |
|  | UKRV Mel15a | 0.980 | 6   | 0.953 |
|  | WeHi-164    | 0.942 | 11  | 0.542 |

**Table S9. Mean ranks of MSN size groups**

|           | MSN Size       | N    | Mean Rank |
|-----------|----------------|------|-----------|
| Viability | under100       | 136  | 710.14    |
|           | Between100&200 | 596  | 663.30    |
|           | Between200&300 | 309  | 590.52    |
|           | Between300&400 | 89   | 547.81    |
|           | Between400&500 | 46   | 592.70    |
|           | above500       | 64   | 297.30    |
|           | Total          | 1240 |           |

**Table S10. Post hoc test of MSN size groups**

| Sample 1-Sample 2       | Test Statistic | Std. Error | Std. Test Statistic | Adj. Sig |
|-------------------------|----------------|------------|---------------------|----------|
| above500-Between300&400 | 250.510        | 58.690     | 4.268               | 0.000    |
| above500-Between200&300 | 293.213        | 49.180     | 5.962               | 0.000    |
| above500-Between400&500 | 295.391        | 69.220     | 4.267               | 0.000    |
| above500-Between100&200 | 365.991        | 47.105     | 7.770               | 0.000    |
| above500-under100       | 412.835        | 54.282     | 7.605               | 0.000    |
| Between300&400-under100 | 162.325        | 48.824     | 3.325               | 0.013    |
| Between200&300-under100 | 119.622        | 36.850     | 3.246               | 0.018    |

**Table S11. Mean ranks of viability assay method Groups**

|           | ViabilityAssayMethod       | N    | Mean Rank |
|-----------|----------------------------|------|-----------|
| Viability | Alamar Blue                | 9    | 519.22    |
|           | Annexin V/IP               | 12   | 694.17    |
|           | ATP-assay                  | 31   | 689.52    |
|           | CCK-8 Assay                | 246  | 631.61    |
|           | CellTiter 96 AQueous Assay | 8    | 280.88    |
|           | CellTiterGlo               | 41   | 642.23    |
|           | FACS                       | 31   | 770.16    |
|           | MTS assay                  | 30   | 954.15    |
|           | MTT                        | 648  | 557.41    |
|           | NRU                        | 16   | 684.06    |
|           | SRB                        | 6    | 729.50    |
|           | WST-1                      | 86   | 759.74    |
|           | WST-8                      | 72   | 719.08    |
|           | Total                      | 1236 |           |

**Table S12. Post hoc test of viability assay method Groups**

| Sample 1-Sample 2                    | Test Statistic | Std. Error | Std. Test Statistic | Adj. Sig. |
|--------------------------------------|----------------|------------|---------------------|-----------|
| CellTiter 96 AQueous Assay-WST-1     | - 478.863      | 131.938    | -3.629              | 0.022     |
| CellTiter 96 AQueous Assay-FACS      | - 489.286      | 141.549    | -3.457              | 0.043     |
| CellTiter 96 AQueous Assay-MTS assay | - 673.275      | 142.033    | -4.740              | 0.000     |
| MTT-WST-8                            | - 161.674      | 44.342     | -3.646              | 0.021     |
| MTT-WST-1                            | - 202.329      | 40.965     | -4.939              | 0.000     |
| MTT-MTS assay                        | 396.740        | 66.660     | 5.952               | 0.000     |

|                        |              |        |        |       |
|------------------------|--------------|--------|--------|-------|
| CCK-8 Assay-MTS assay  | -<br>322.544 | 69.028 | -4.673 | 0.000 |
| CellTiterGlo-MTS assay | -<br>311.918 | 85.759 | -3.637 | 0.022 |

**Table S13. Mean ranks of incubation time groups**

|           | Incubation time | N    | Mean Rank |
|-----------|-----------------|------|-----------|
| Viability | 24 h            | 567  | 631.26    |
|           | 48 h            | 467  | 565.56    |
|           | 72 h            | 183  | 650.88    |
|           | Total           | 1217 |           |

**Table S14. Post hoc test of incubation time groups**

| Sample 1-Sample 2 | Test<br>Statistic | Std. Error | Std. Test<br>Statistic | Adj. Sig |
|-------------------|-------------------|------------|------------------------|----------|
| 48 h – 24 h       | 65.701            | 21.963     | 2.991                  | 0.008    |
| 48 h – 72 h       | -85.316           | 30.651     | -2.783                 | 0.016    |
| 24 h – 72 h       | -19.615           | 29.881     | -.656                  | 1.000    |

**Table S15. Mean ranks of MSN zeta-potential Groups**

|           | Zeta-potential groups | N    | Mean Rank |
|-----------|-----------------------|------|-----------|
| Viability | -30 and below         | 453  | 637.79    |
|           | -30 to -10            | 345  | 603.58    |
|           | -10 to +10            | 29   | 939.62    |
|           | +10 to +30            | 264  | 611.35    |
|           | +30 and above         | 149  | 561.20    |
|           | Total                 | 1240 |           |

**Table S16. Post hoc test of MSNs' zeta-potential Groups**

| Sample 1 - Sample 2          | Test Statistic | Std. Error | Std. Test Statistic | Adj. Sig |
|------------------------------|----------------|------------|---------------------|----------|
| +30 and above - (-10 to +10) | 378.419        | 72.681     | 5.207               | 0.000    |
| -30 to -10 - (-10 to +10)    | -336.041       | 69.236     | -4.854              | 0.000    |
| +10 to +30 - (-10 to +10)    | 328.270        | 70.055     | 4.686               | 0.000    |
| -30 and below – (-10 to +10) | -301.827       | 68.593     | -4.400              | 0.000    |

**Table S17. Shapiro Wilk's Test of normality for functionalised and non-functionalised MSN groups in the dataset**

|           | Functionalised or Non-Functionalised | Shapiro-Wilk |     |       |
|-----------|--------------------------------------|--------------|-----|-------|
|           |                                      | Statistic    | df  | Sig.  |
| Viability | No Surface Functionalization         | 0.753        | 463 | 0.000 |
|           | Surface Functionalised               | 0.820        | 777 | 0.000 |

**Table S18. Mean ranks of Functionalization Groups**

|           | Functionalization Groups        | N   | Mean Rank |
|-----------|---------------------------------|-----|-----------|
| Viability | 3- aminopropyl                  | 22  | 416.66    |
|           | F2                              | 5   | 604.80    |
|           | Ag-Nps                          | 14  | 509.79    |
|           | Amine group (-NH <sub>2</sub> ) | 164 | 600.83    |
|           | F5                              | 14  | 899.86    |
|           | Caffeic acid                    | 8   | 78.50     |



|  |                         |     |         |
|--|-------------------------|-----|---------|
|  | carboxyl functionalised | 138 | 791.02  |
|  | F8                      | 15  | 811.73  |
|  | F9                      | 6   | 731.00  |
|  | F10                     | 24  | 412.33  |
|  | F11                     | 24  | 514.33  |
|  | F12                     | 24  | 528.56  |
|  | concanavalin A          | 8   | 281.25  |
|  | DSPE-PEG2K-FA           | 15  | 751.93  |
|  | F15                     | 10  | 408.50  |
|  | Fluorescein PEI-PEG     | 17  | 693.68  |
|  | F17                     | 16  | 668.94  |
|  | F18                     | 28  | 701.57  |
|  | Hyaluronic acid         | 16  | 695.34  |
|  | F20                     | 6   | 643.33  |
|  | F21                     | 16  | 651.44  |
|  | F22                     | 14  | 681.43  |
|  | none                    | 463 | 570.02  |
|  | OH                      | 5   | 910.60  |
|  | PEG/COOH                | 36  | 688.26  |
|  | Phenylboronic acid      | 12  | 829.17  |
|  | F27                     | 6   | 499.58  |
|  | polyacrylic acid        | 24  | 735.58  |
|  | polyethyleneimine       | 8   | 281.75  |
|  | F30                     | 8   | 475.63  |
|  | Rutin                   | 8   | 268.06  |
|  | F32                     | 22  | 418.39  |
|  | F33                     | 3   | 1231.17 |
|  | F34                     | 3   | 830.67  |
|  | F35                     | 3   | 1229.17 |
|  | F36                     | 3   | 1235.67 |

|  |                    |      |        |
|--|--------------------|------|--------|
|  | Thiol-modified MSN | 8    | 739.00 |
|  | Titanium           | 5    | 919.50 |
|  | F39                | 14   | 970.68 |
|  | F40                | 4    | 700.88 |
|  | Total              | 1239 |        |

**Table S19. Post hoc test of functionalization Groups.** <sup>a</sup> Significance values have been adjusted by the Bonferroni correction for multiple tests

| Sample 1-Sample 2                            | Test Statistic | Std. Error | Std. Test Statistic | Adj. Sig. <sup>a</sup> |
|----------------------------------------------|----------------|------------|---------------------|------------------------|
| Caffeic acid-Amine group (-NH <sub>2</sub> ) | 522.332        | 129.554    | 4.032               | 0.043                  |
| Caffeic acid-PEG/COOH                        | -609.764       | 139.857    | -4.360              | 0.010                  |
| Caffeic acid-Fluorescein PEI-PEG             | -615.176       | 153.410    | -4.010              | 0.047                  |
| Caffeic acid-F18                             | -623.071       | 143.444    | -4.344              | 0.011                  |
| Caffeic acid-polyacrylic acid                | -657.083       | 146.076    | -4.498              | 0.005                  |
| Caffeic acid-DSPE-PEG2K-FA                   | -673.433       | 156.649    | -4.299              | 0.013                  |
| Caffeic acid-carboxyl functionalised         | -712.518       | 130.120    | -5.476              | 0.000                  |
| Caffeic acid-F8                              | -733.233       | 156.649    | -4.681              | 0.002                  |
| Caffeic acid-Phenylboronic acid              | -750.667       | 163.318    | -4.596              | 0.003                  |
| Caffeic acid-F5                              | 821.357        | 158.583    | 5.179               | 0.000                  |
| Caffeic acid-OH                              | -832.100       | 203.984    | -4.079              | 0.035                  |
| Caffeic acid-Titanium                        | -841.000       | 203.984    | -4.123              | 0.029                  |
| Caffeic acid-F39                             | -892.179       | 158.583    | -5.626              | 0.000                  |
| Caffeic acid-F35                             | -1150.667      | 242.239    | -4.750              | 0.002                  |
| Caffeic acid-F33                             | -1152.667      | 242.239    | -4.758              | 0.002                  |
| Caffeic acid-F36                             | -1157.167      | 242.239    | -4.777              | 0.001                  |
| Rutin-carboxyl functionalised                | 522.956        | 130.120    | 4.019               | 0.046                  |
| Rutin-F39                                    | -702.616       | 158.583    | -4.431              | 0.007                  |
| concanavalin A-F39                           | -689.429       | 158.583    | -4.347              | 0.011                  |
| polyethyleneimine-F39                        | -688.929       | 158.583    | -4.344              | 0.011                  |
| F10-carboxyl functionalised                  | 378.685        | 79.135     | 4.785               | 0.001                  |

|                                                         |          |         |        |       |
|---------------------------------------------------------|----------|---------|--------|-------|
| F10-F5                                                  | 487.524  | 120.331 | 4.052  | 0.040 |
| F10-F39                                                 | -558.345 | 120.331 | -4.640 | 0.003 |
| 3- aminopropyl-carboxyl functionalised                  | -374.359 | 82.142  | -4.557 | 0.004 |
| 3- aminopropyl-F39                                      | -554.019 | 122.329 | -4.529 | 0.005 |
| F32-carboxyl functionalised                             | 372.632  | 82.142  | 4.536  | 0.004 |
| F32-F39                                                 | -552.292 | 122.329 | -4.515 | 0.005 |
| none-carboxyl functionalised                            | 221.002  | 34.703  | 6.368  | 0.000 |
| none-F39                                                | -400.662 | 97.064  | -4.128 | 0.029 |
| Amine group (-NH <sub>2</sub> )-carboxyl functionalised | -190.186 | 41.333  | -4.601 | 0.003 |

**Table S20. Mean ranks of cell types Groups**

|           | Cell Type  | N  | Mean Rank |
|-----------|------------|----|-----------|
| Viability | 3T3        | 6  | 773.75    |
|           | 4T1        | 14 | 655.07    |
|           | A549       | 6  | 760.08    |
|           | A875       | 10 | 622.50    |
|           | B16-F10    | 10 | 758.05    |
|           | BALB/c 3T3 | 32 | 459.77    |
|           | BEAS-2B    | 36 | 758.47    |
|           | bEND.3     | 6  | 945.92    |
|           | C2C12      | 20 | 970.53    |
|           | Caco-2     | 40 | 291.44    |
|           | CCRF-CEM   | 8  | 395.00    |
|           | Colon-26   | 4  | 703.00    |
|           | COS7       | 10 | 529.70    |
|           | Daudi      | 10 | 956.50    |

|  |              |     |         |
|--|--------------|-----|---------|
|  | DMSCs        | 10  | 955.45  |
|  | EA.hy926     | 3   | 210.33  |
|  | HaCaT        | 14  | 717.00  |
|  | HaCaT-L      | 16  | 161.44  |
|  | HEK 293 T    | 22  | 511.89  |
|  | HEK-293      | 97  | 569.76  |
|  | HEK-293TRPA1 | 8   | 419.81  |
|  | HEK-293TRPM2 | 8   | 290.50  |
|  | HEK-293TRPM8 | 8   | 304.00  |
|  | HEK-293TRPV4 | 8   | 303.13  |
|  | HeLa         | 26  | 640.67  |
|  | HEP-G2       | 99  | 665.27  |
|  | HFF-1        | 48  | 732.72  |
|  | HFLS         | 12  | 678.00  |
|  | HL-7702      | 12  | 674.46  |
|  | hMSCs        | 6   | 927.08  |
|  | HOS          | 5   | 305.40  |
|  | HT-29        | 9   | 747.61  |
|  | Huh-7        | 4   | 1052.88 |
|  | HUVEC        | 24  | 793.69  |
|  | Jurkat       | 10  | 779.20  |
|  | L-02         | 54  | 544.61  |
|  | L929         | 3   | 359.00  |
|  | LNCaP        | 12  | 733.54  |
|  | LS 174T      | 12  | 211.42  |
|  | MC3T3-E1     | 4   | 384.25  |
|  | MCF-10a      | 4   | 633.50  |
|  | MCF-7        | 100 | 576.49  |
|  | MDA-MB-231   | 32  | 567.77  |
|  | MDCK         | 6   | 959.83  |

|  |             |      |         |
|--|-------------|------|---------|
|  | MMT         | 7    | 883.64  |
|  | Mtag        | 7    | 1059.43 |
|  | NCM460      | 3    | 799.00  |
|  | NIH-3T3     | 14   | 693.50  |
|  | NR8383      | 16   | 472.06  |
|  | PC-3        | 12   | 738.54  |
|  | Raji        | 10   | 906.65  |
|  | Ramos (RA1) | 13   | 414.69  |
|  | RAW 264.7   | 20   | 387.98  |
|  | SCC-7       | 5    | 605.00  |
|  | SH-SY5Y     | 5    | 275.60  |
|  | SK-BR-3     | 4    | 701.38  |
|  | SMMC-77721  | 4    | 829.50  |
|  | SW480       | 3    | 488.33  |
|  | SW620       | 5    | 530.60  |
|  | THP-1       | 36   | 538.22  |
|  | TZM-bl      | 155  | 683.53  |
|  | U937        | 16   | 962.75  |
|  | UKRV Mel15a | 6    | 738.25  |
|  | WeHi-164    | 11   | 669.82  |
|  | Total       | 1240 |         |

**Table S21. Post hoc test of cell type Groups**

| Sample 1-Sample 2 | Test Statistic | Std. Error | Std. Test Statistic | Adj. Sig |
|-------------------|----------------|------------|---------------------|----------|
| HaCaT-L-HEK-293   | -408.325       | 96.627     | -4.226              | 0.048    |
| HaCaT-L-MCF-7     | -415.048       | 96.421     | -4.305              | 0.034    |
| HaCaT-L-HEP-G2    | -503.830       | 96.488     | -5.222              | 0.000    |

|                 |              |         |        |       |
|-----------------|--------------|---------|--------|-------|
| HaCaT-L-TZM-bl  | -<br>522.095 | 94.032  | -5.552 | 0.000 |
| HaCaT-L-HaCaT   | 555.563      | 131.051 | 4.239  | 0.045 |
| HaCaT-L-HFF-1   | -<br>571.281 | 103.375 | -5.526 | 0.000 |
| HaCaT-L-PC-3    | -<br>577.104 | 136.752 | -4.220 | 0.049 |
| HaCaT-L-BEAS-2B | 597.035      | 107.596 | 5.549  | 0.000 |
| HaCaT-L-Jurkat  | -<br>617.763 | 144.355 | -4.279 | 0.038 |
| HaCaT-L-HUVEC   | -<br>632.250 | 115.576 | -5.470 | 0.000 |
| HaCaT-L-MMT     | -<br>722.205 | 162.278 | -4.450 | 0.017 |
| HaCaT-L-Raji    | -<br>745.213 | 144.355 | -5.162 | 0.000 |
| HaCaT-L-hMSCs   | -<br>765.646 | 171.427 | -4.466 | 0.016 |
| HaCaT-L-bEND.3  | 784.479      | 171.427 | 4.576  | 0.010 |
| HaCaT-L-DMSCs   | 794.013      | 144.355 | 5.500  | 0.000 |
| HaCaT-L-Daudi   | 795.063      | 144.355 | 5.508  | 0.000 |
| HaCaT-L-MDCK    | -<br>798.396 | 171.427 | -4.657 | 0.006 |
| HaCaT-L-U937    | -<br>801.313 | 126.607 | -6.329 | 0.000 |
| HaCaT-L-C2C12   | 809.088      | 120.110 | 6.736  | 0.000 |
| HaCaT-L-Huh-7   | -<br>891.438 | 200.184 | -4.453 | 0.017 |
| HaCaT-L-Mtag    | -<br>897.991 | 162.278 | -5.534 | 0.000 |
| LS 174T-TZM-bl  | -<br>472.116 | 107.302 | -4.400 | 0.022 |
| LS 174T-HFF-1   | 521.302      | 115.576 | 4.510  | 0.013 |
| LS 174T-BEAS-2B | 547.056      | 119.367 | 4.583  | 0.009 |
| LS 174T-HUVEC   | 582.271      | 126.607 | 4.599  | 0.009 |

|                    |              |         |        |       |
|--------------------|--------------|---------|--------|-------|
| LS 174T-Raji       | -<br>695.233 | 153.329 | -4.534 | 0.012 |
| LS 174T-DMSCs      | 744.033      | 153.329 | 4.853  | 0.002 |
| LS 174T-Daudi      | 745.083      | 153.329 | 4.859  | 0.002 |
| LS 174T-U937       | -<br>751.333 | 136.752 | -5.494 | 0.000 |
| LS 174T-C2C12      | 759.108      | 130.760 | 5.805  | 0.000 |
| LS 174T-Mtag       | -<br>848.012 | 170.310 | -4.979 | 0.001 |
| HEK-293TRPM2-U937  | -<br>672.250 | 155.062 | -4.335 | 0.029 |
| HEK-293TRPM2-C2C12 | 680.025      | 149.804 | 4.539  | 0.011 |
| Caco-2-MCF-7       | -<br>285.048 | 66.994  | -4.255 | 0.042 |
| Caco-2-HEP-G2      | -<br>373.830 | 67.091  | -5.572 | 0.000 |
| Caco-2-TZM-bl      | -<br>392.095 | 63.508  | -6.174 | 0.000 |
| Caco-2-HFF-1       | -<br>441.281 | 76.665  | -5.756 | 0.000 |
| Caco-2-BEAS-2B     | 467.035      | 82.268  | 5.677  | 0.000 |
| Caco-2-HUVEC       | -<br>502.250 | 92.461  | -5.432 | 0.000 |
| Caco-2-Raji        | -<br>615.213 | 126.607 | -4.859 | 0.002 |
| Caco-2-DMSCs       | -<br>664.013 | 126.607 | -5.245 | 0.000 |
| Caco-2-Daudi       | -<br>665.063 | 126.607 | -5.253 | 0.000 |
| Caco-2-MDCK        | -<br>668.396 | 156.775 | -4.263 | 0.041 |
| Caco-2-U937        | -<br>671.313 | 105.927 | -6.337 | 0.000 |
| Caco-2-C2C12       | 679.088      | 98.070  | 6.925  | 0.000 |

|                    |              |         |        |       |
|--------------------|--------------|---------|--------|-------|
| Caco-2-Mtag        | -<br>767.991 | 146.715 | -5.235 | 0.000 |
| HEK-293TRPV4-U937  | -<br>659.625 | 155.062 | -4.254 | 0.042 |
| HEK-293TRPV4-C2C12 | 667.400      | 149.804 | 4.455  | 0.017 |
| HEK-293TRPM8-U937  | -<br>658.750 | 155.062 | -4.248 | 0.043 |
| HEK-293TRPM8-C2C12 | 666.525      | 149.804 | 4.449  | 0.017 |
| RAW 264.7-U937     | -<br>574.775 | 120.110 | -4.785 | 0.003 |
| RAW 264.7-C2C12    | 582.550      | 113.241 | 5.144  | 0.001 |
| RAW 264.7-Mtag     | 671.454      | 157.261 | 4.270  | 0.039 |
| Ramos (RA1)-C2C12  | 555.833      | 127.578 | 4.357  | 0.027 |
| BALB/c 3T3-U937    | -<br>502.984 | 109.645 | -4.587 | 0.009 |
| BALB/c 3T3-C2C12   | -<br>510.759 | 102.074 | -5.004 | 0.001 |
| THP-1-C2C12        | 432.303      | 99.869  | 4.329  | 0.030 |
| L-02-C2C12         | 425.914      | 93.736  | 4.544  | 0.011 |
| HEK-293-C2C12      | 400.762      | 87.942  | 4.557  | 0.010 |
| MCF-7-C2C12        | 394.040      | 87.716  | 4.492  | 0.014 |
